# Supplementary material for: Prevalence of depression among the elderly (60 years and above) population in India, 1997–2016: a systematic review and meta-analysis
Source: Springer Nature journal article supplement (doi:10.1186/s12889-019-7136-z), 2019-06-27

Supplementary figure 1: Estimated prevalence of depression among elderly persons in India-pooling included studies, 1997-2016 (Rural vs urban - subgroup analysis)

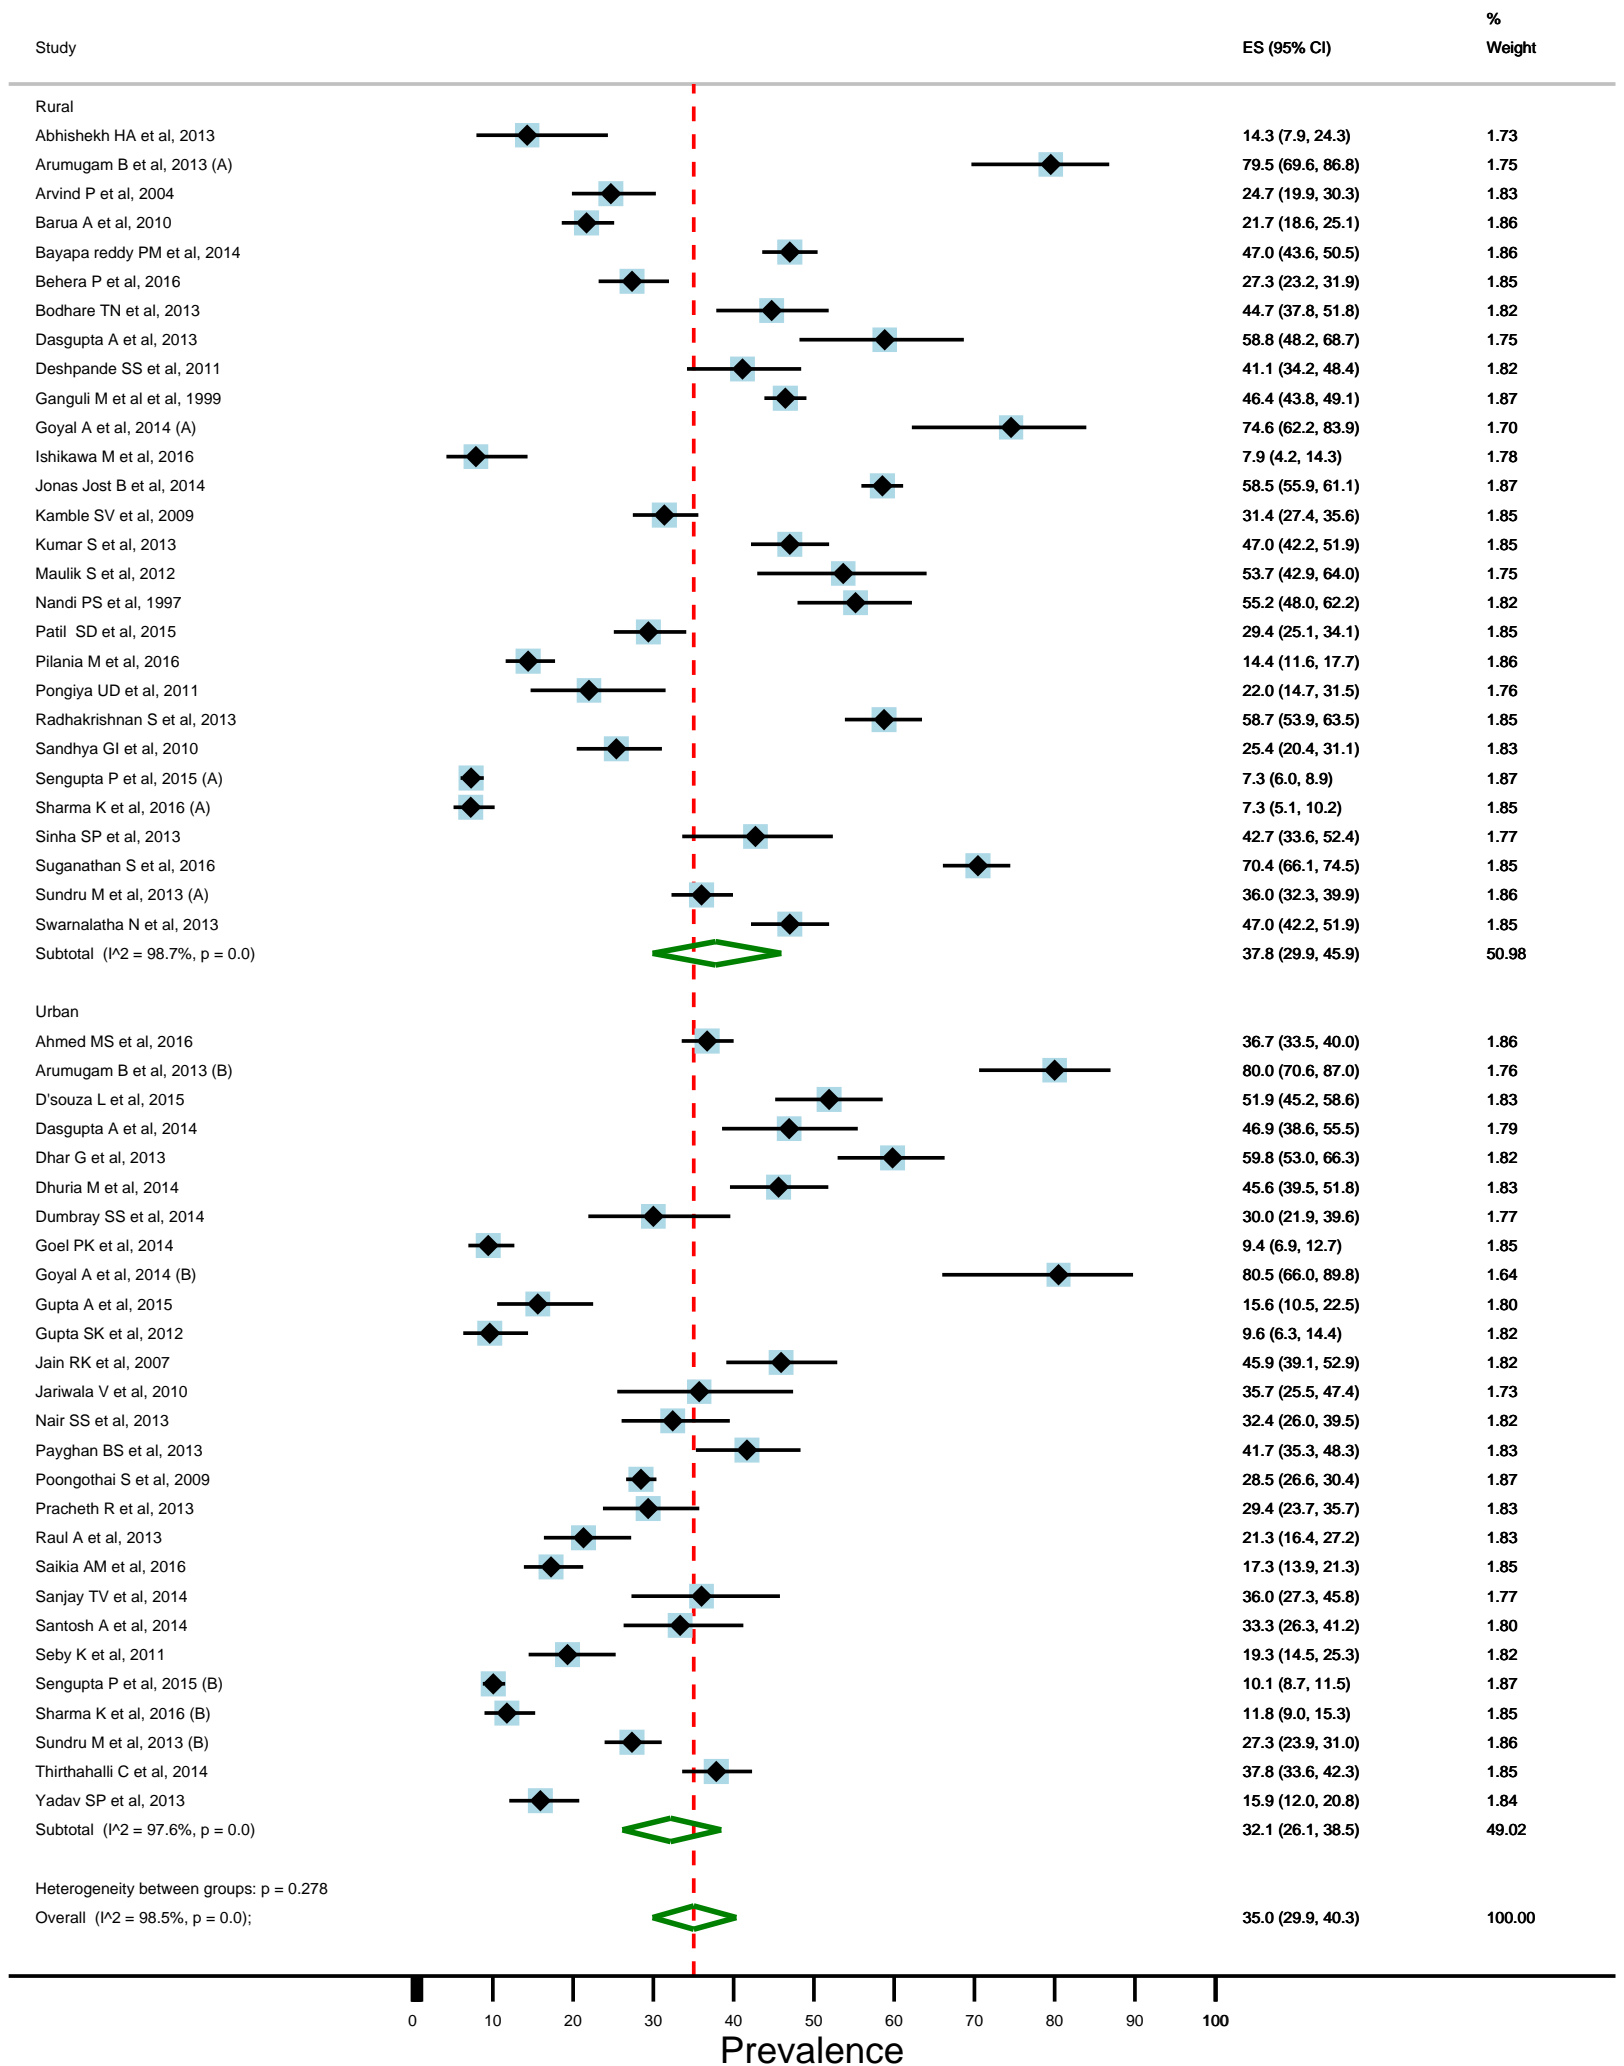

Supplementary figure 2: Estimated prevalence of depression among elderly persons in India-pooling included studies, 1997-2016 (Sampling techniques - subgroup analysis)

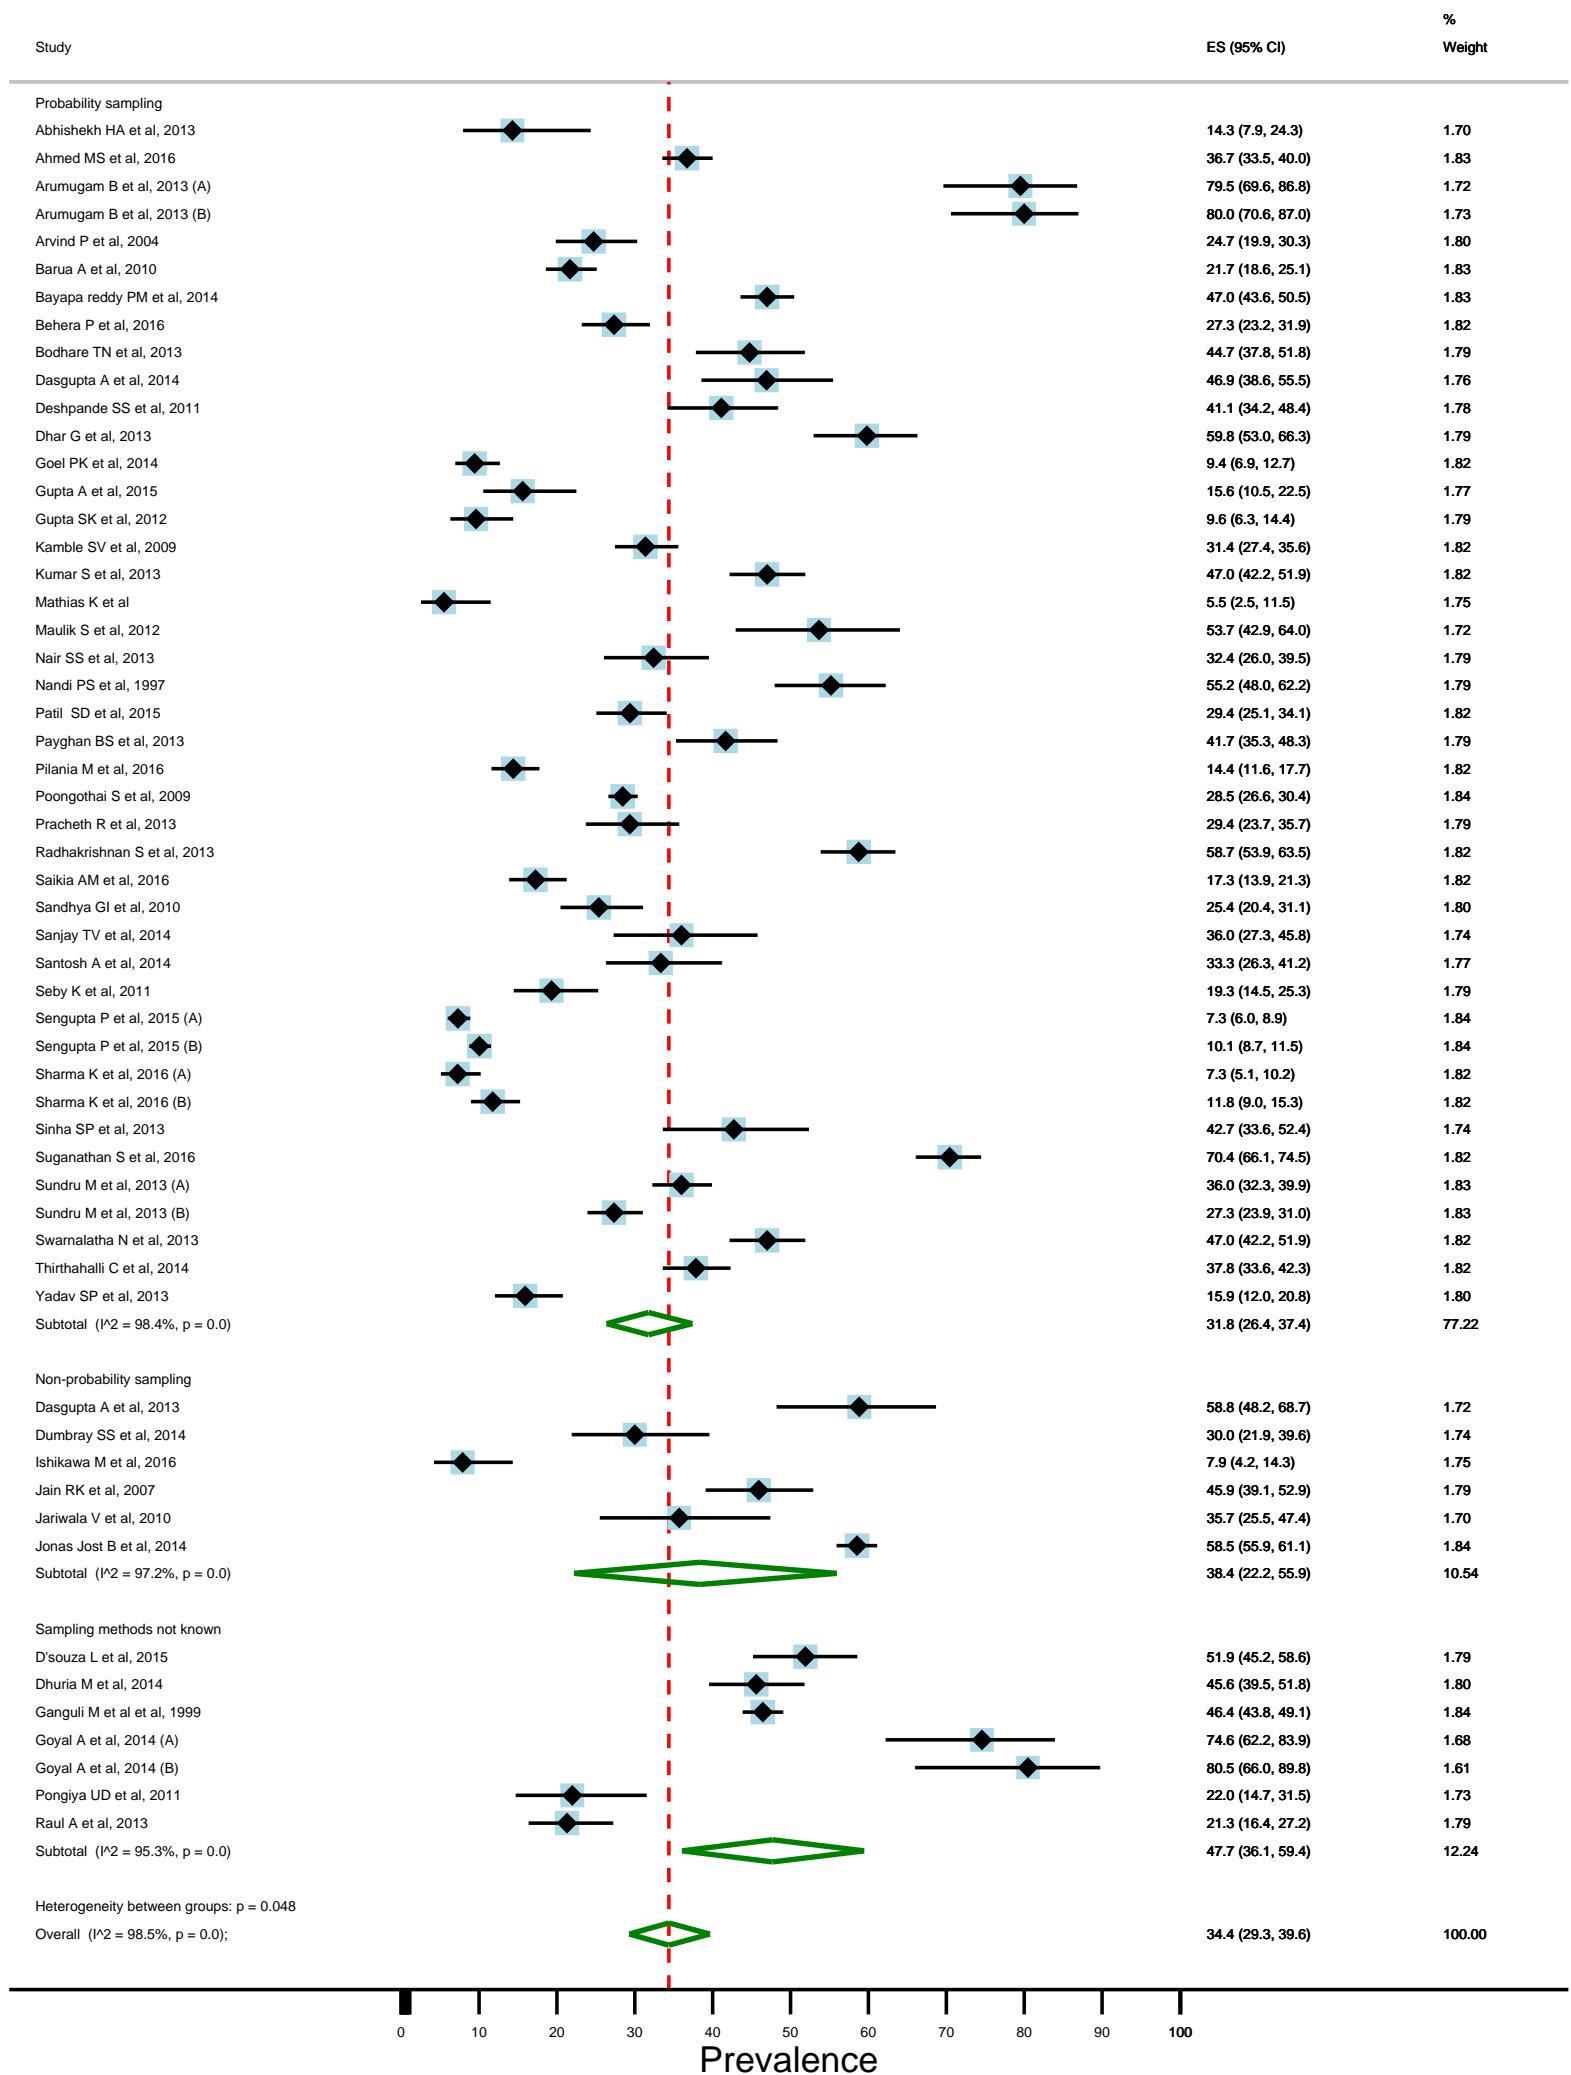

Supplementary figure 3: Estimated prevalence of depression among elderly persons in India-pooling included studies, 1997-2016 (Study instruments - subgroup analysis)

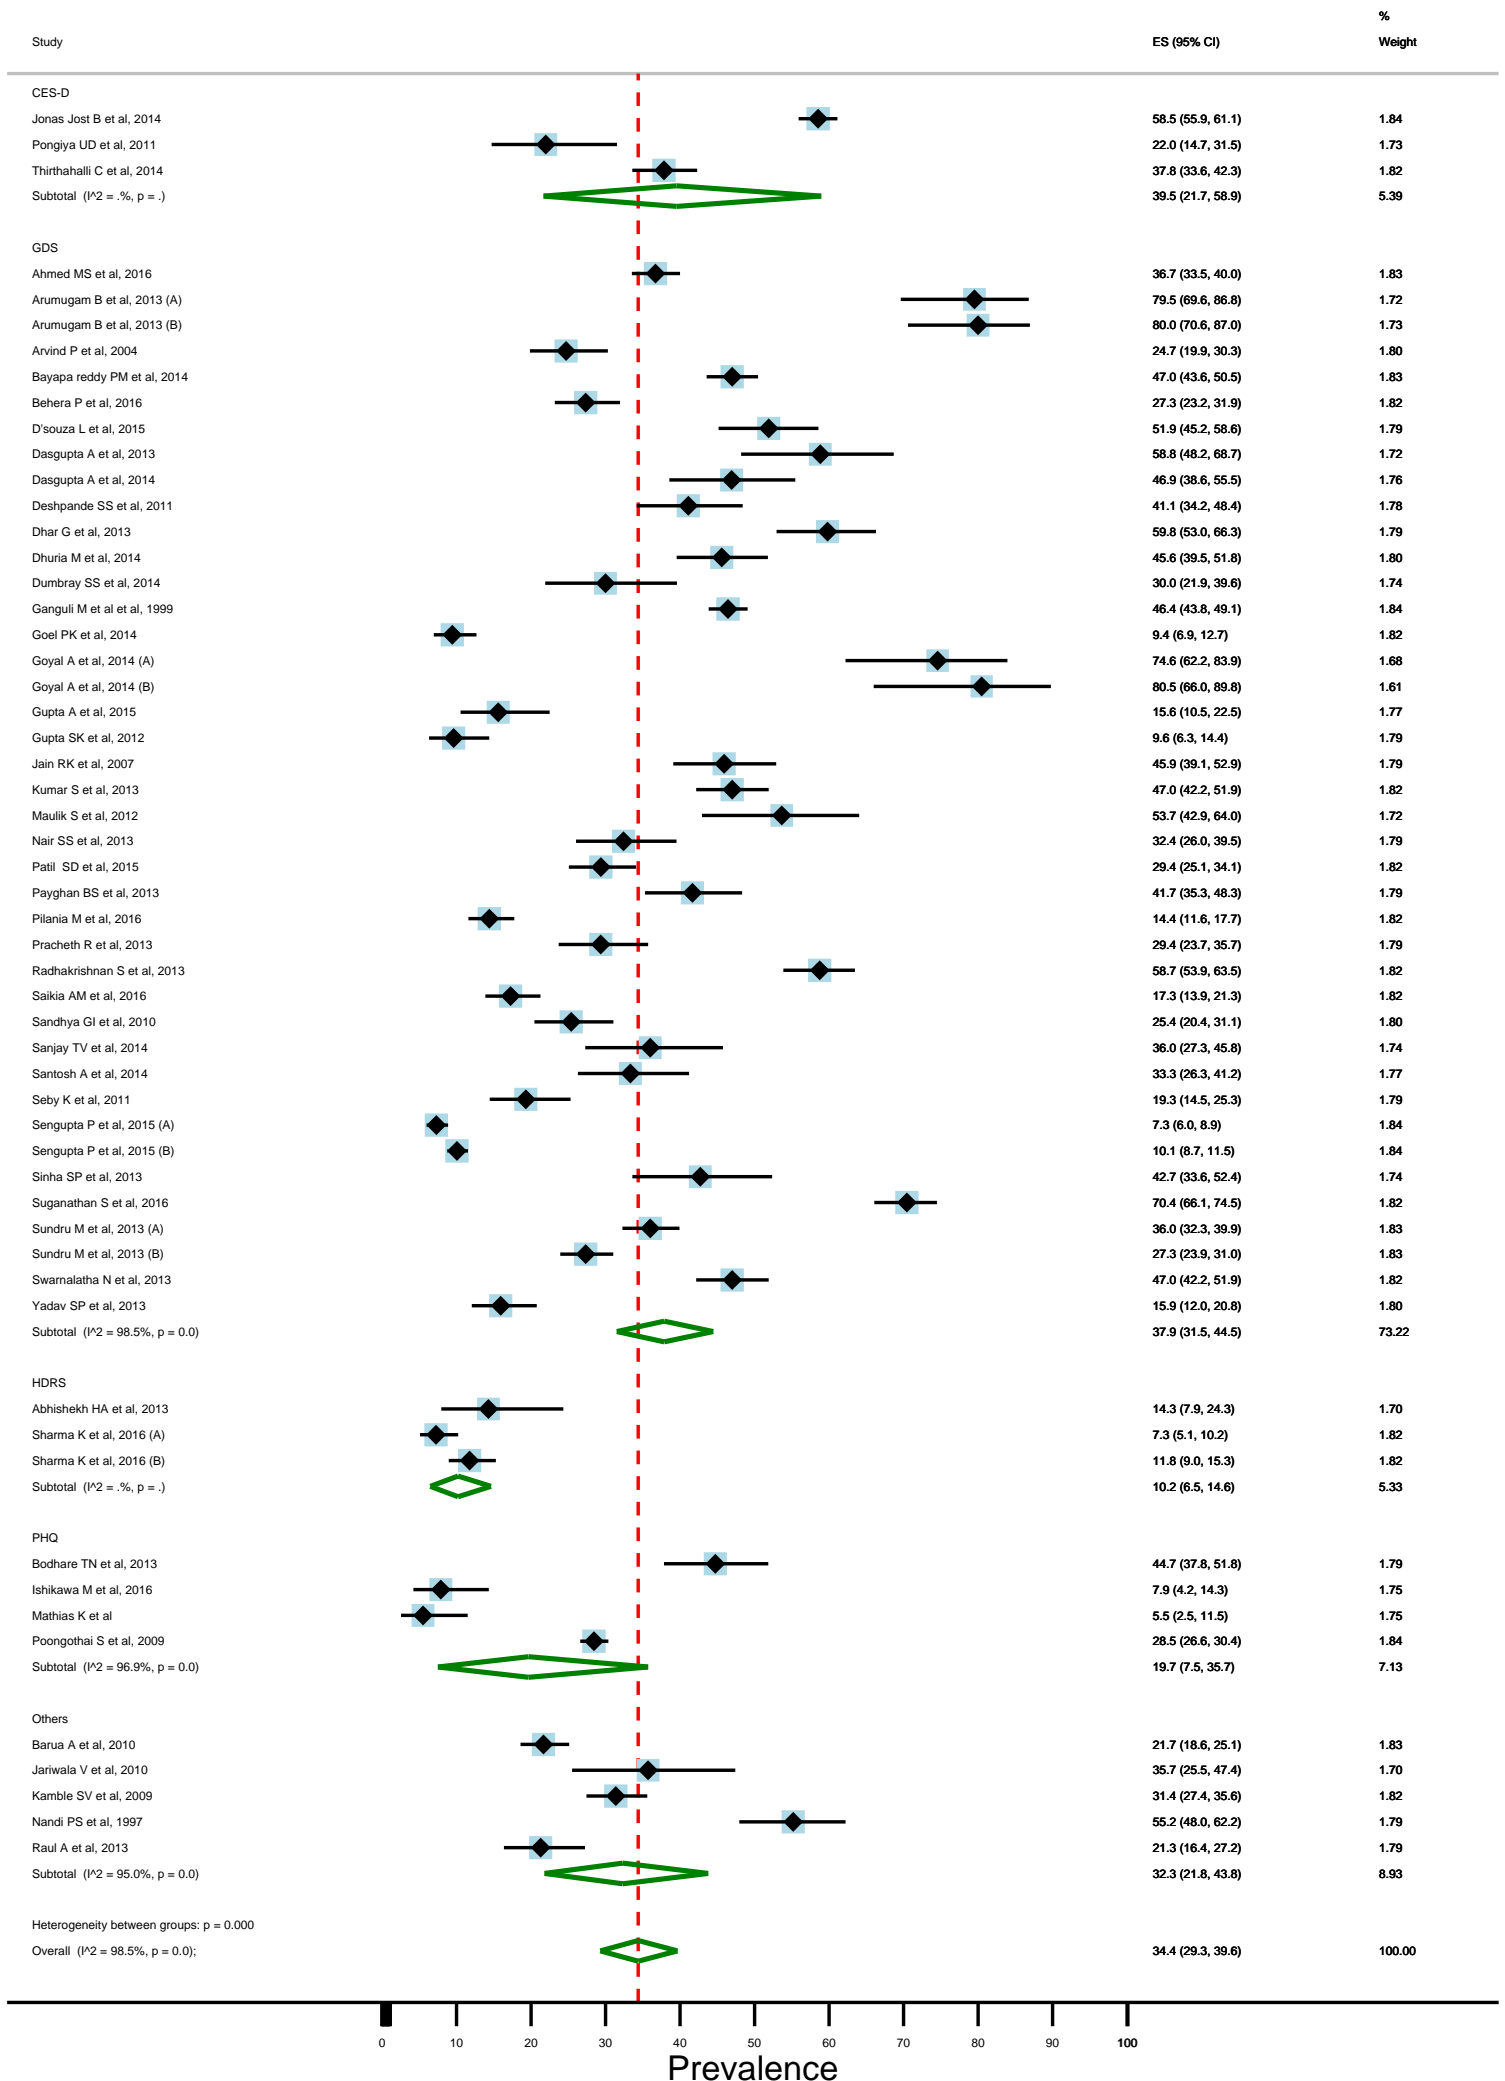

Supplementary figure 4: Estimated prevalence of depression among elderly persons in India-pooling included studies, 1997-2016 (Study instruments for geriatric vs. nongeriatric age groups - subgroup analysis)

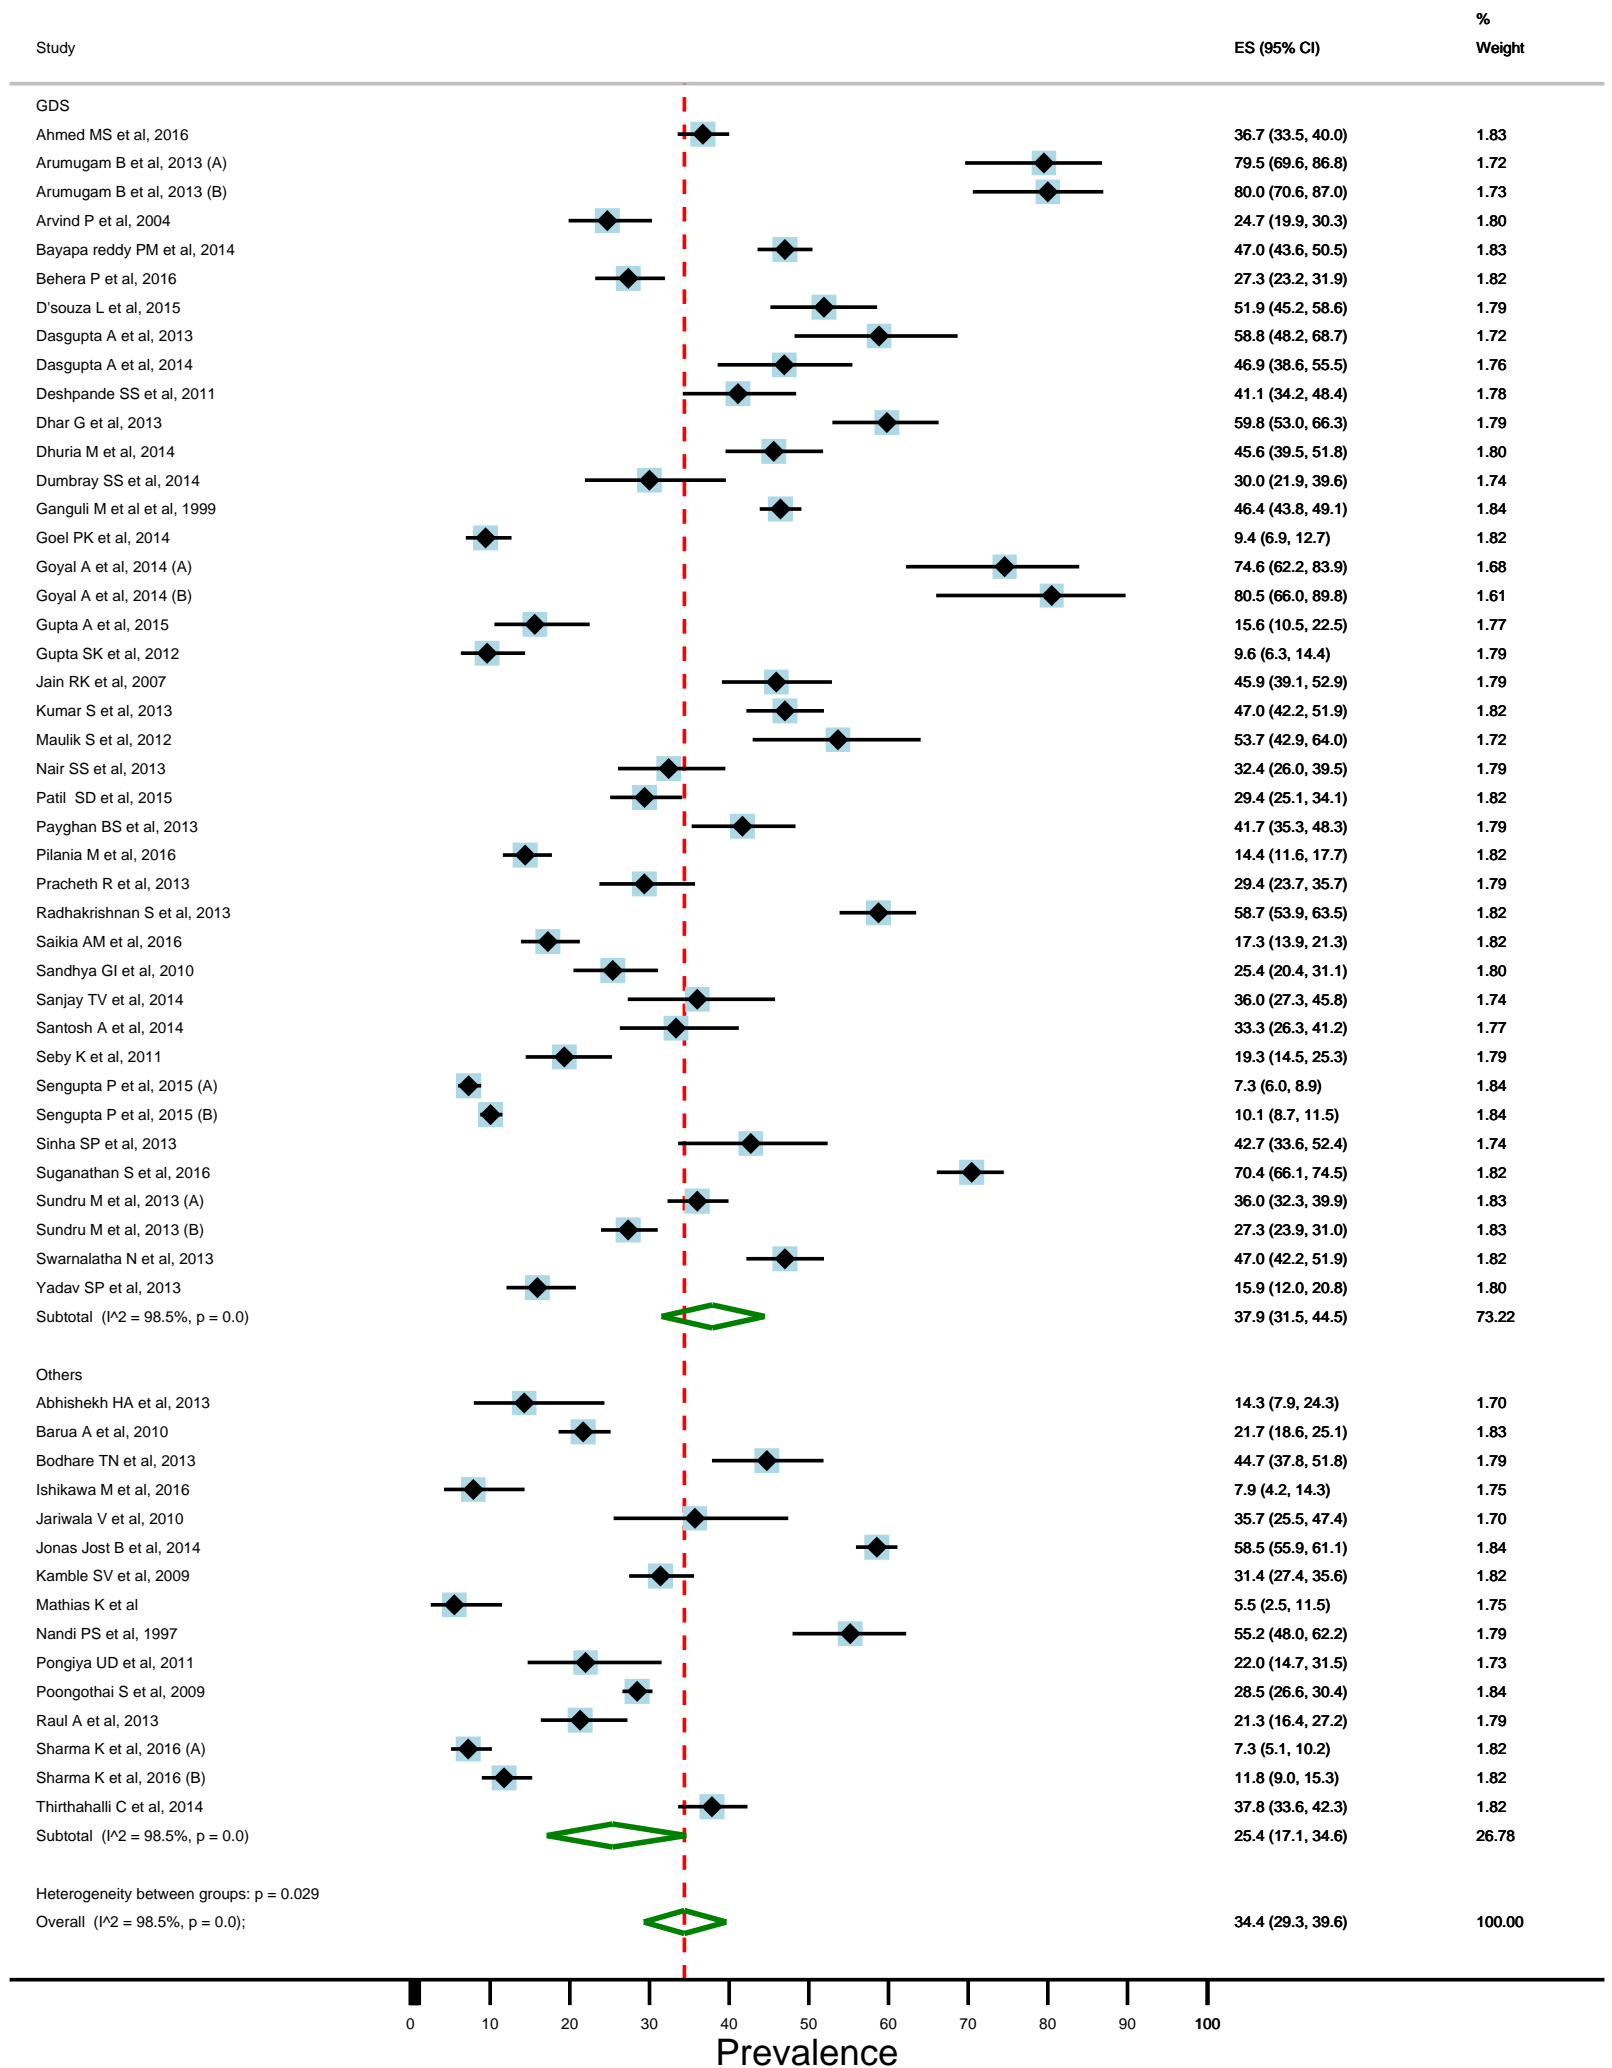

Supplementary figure 5: Estimated prevalence of depression among elderly persons in India- pooling included studies, 1997-2016 (EAG vs Non-EAG states of India - subgroup analysis)

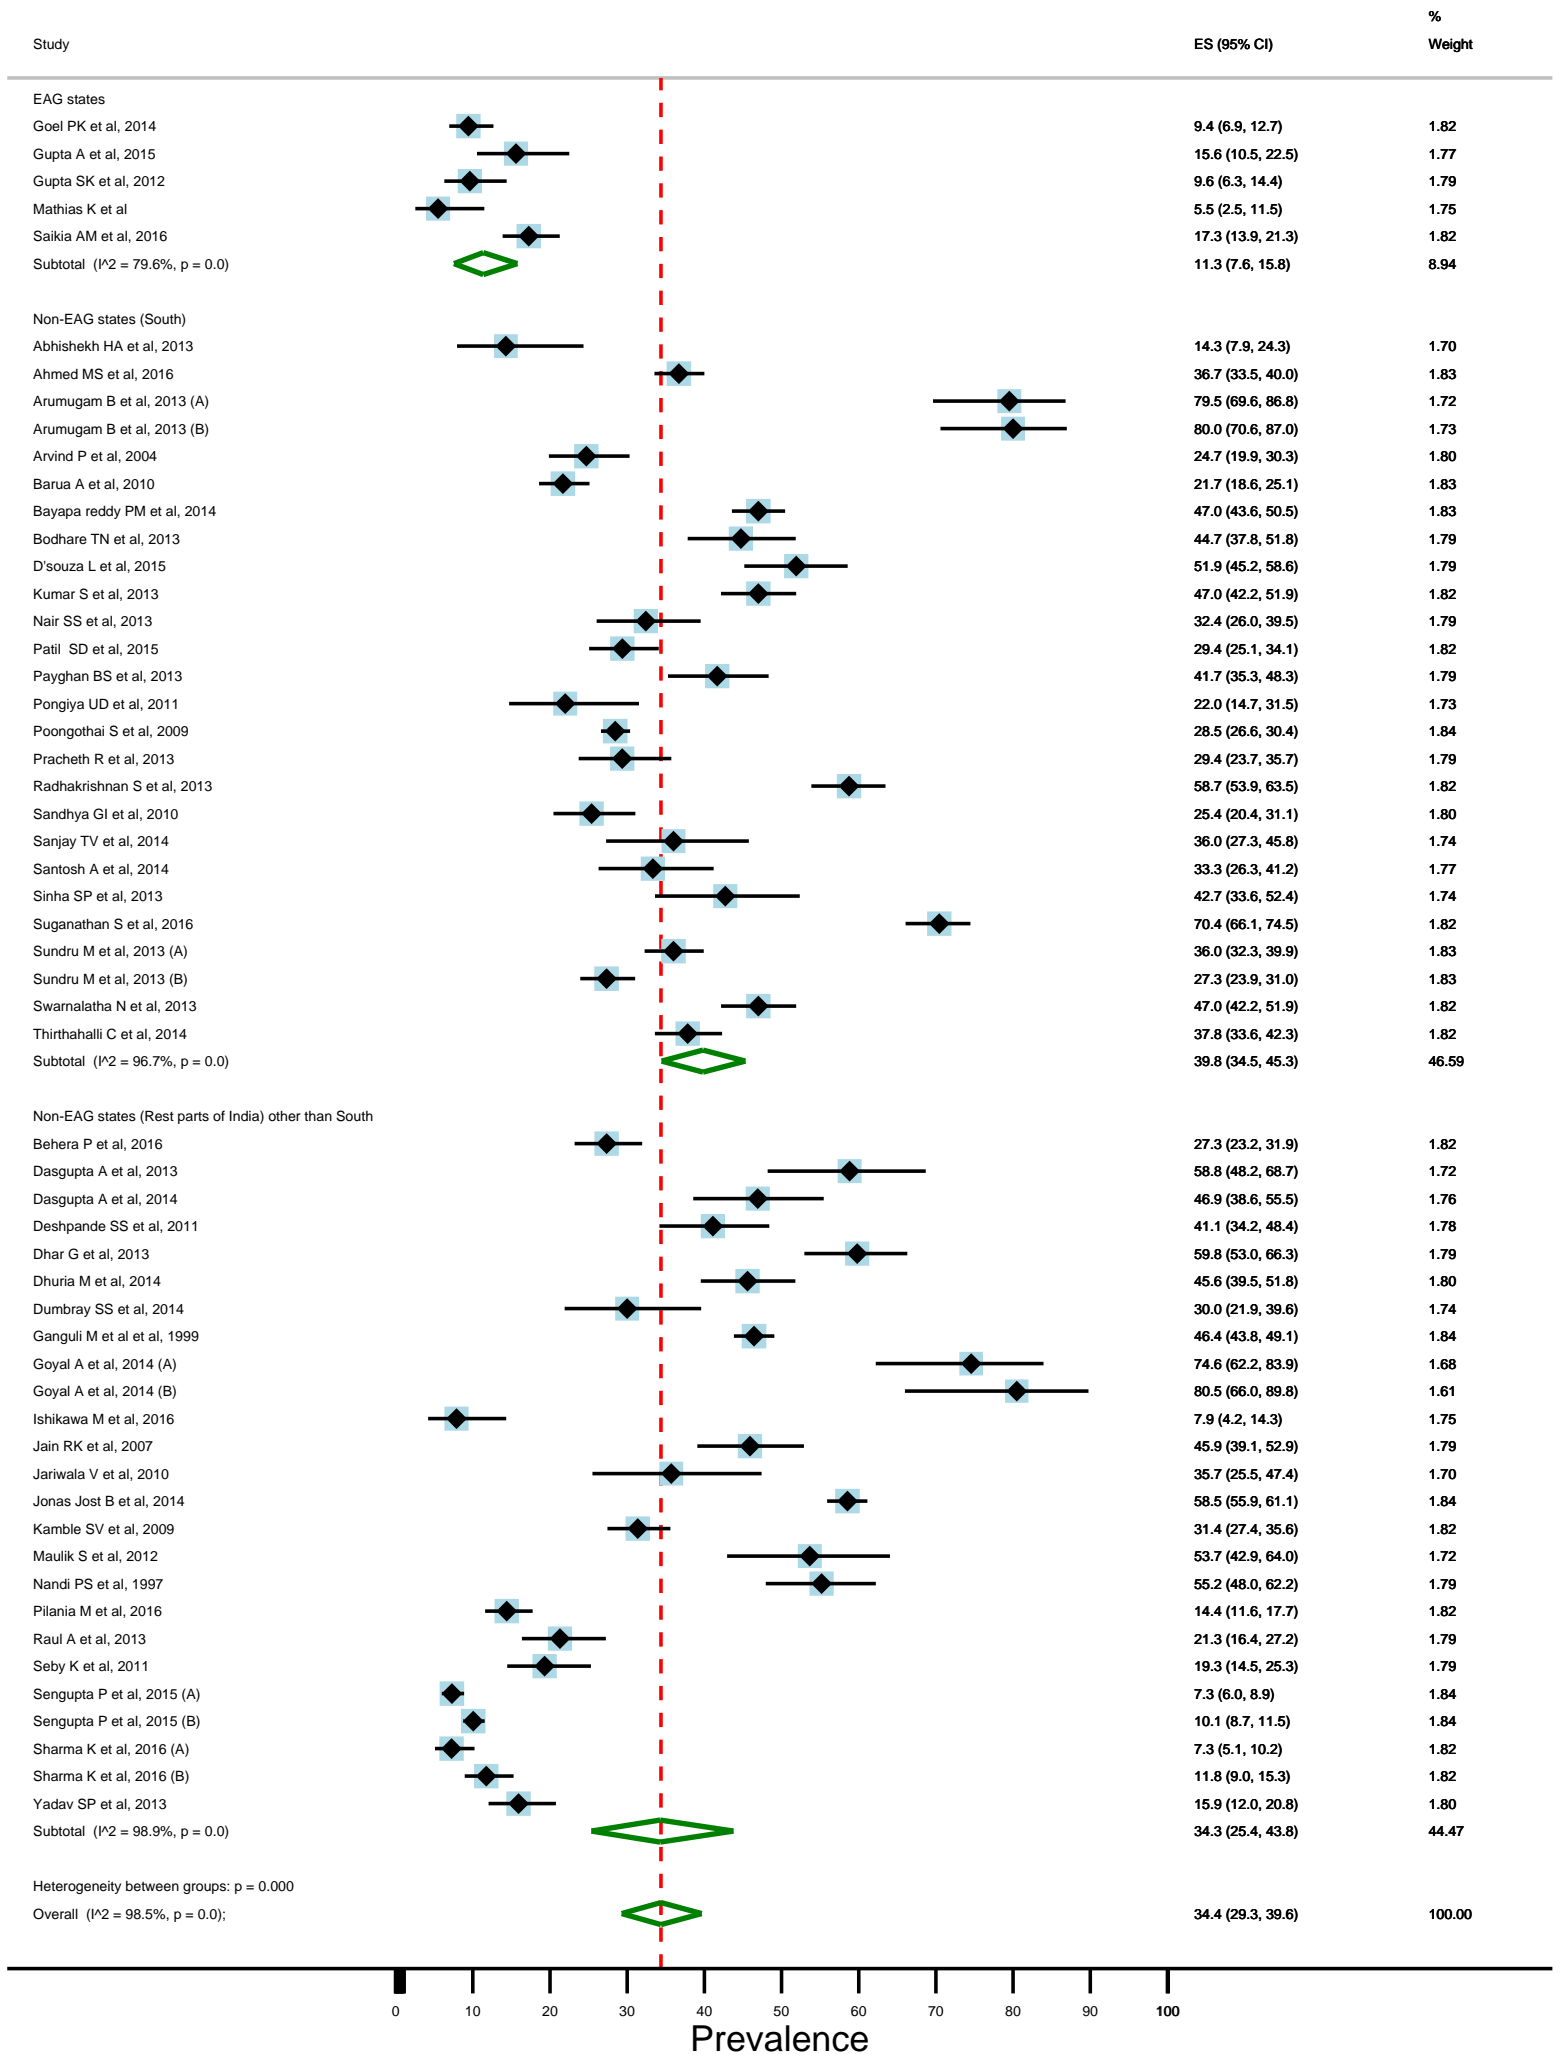

Supplementary figure 6: Estimated prevalence of depression among elderly persons in India- pooling included studies, 1997-2016 (Geographical regions of India- subgroup analysis)

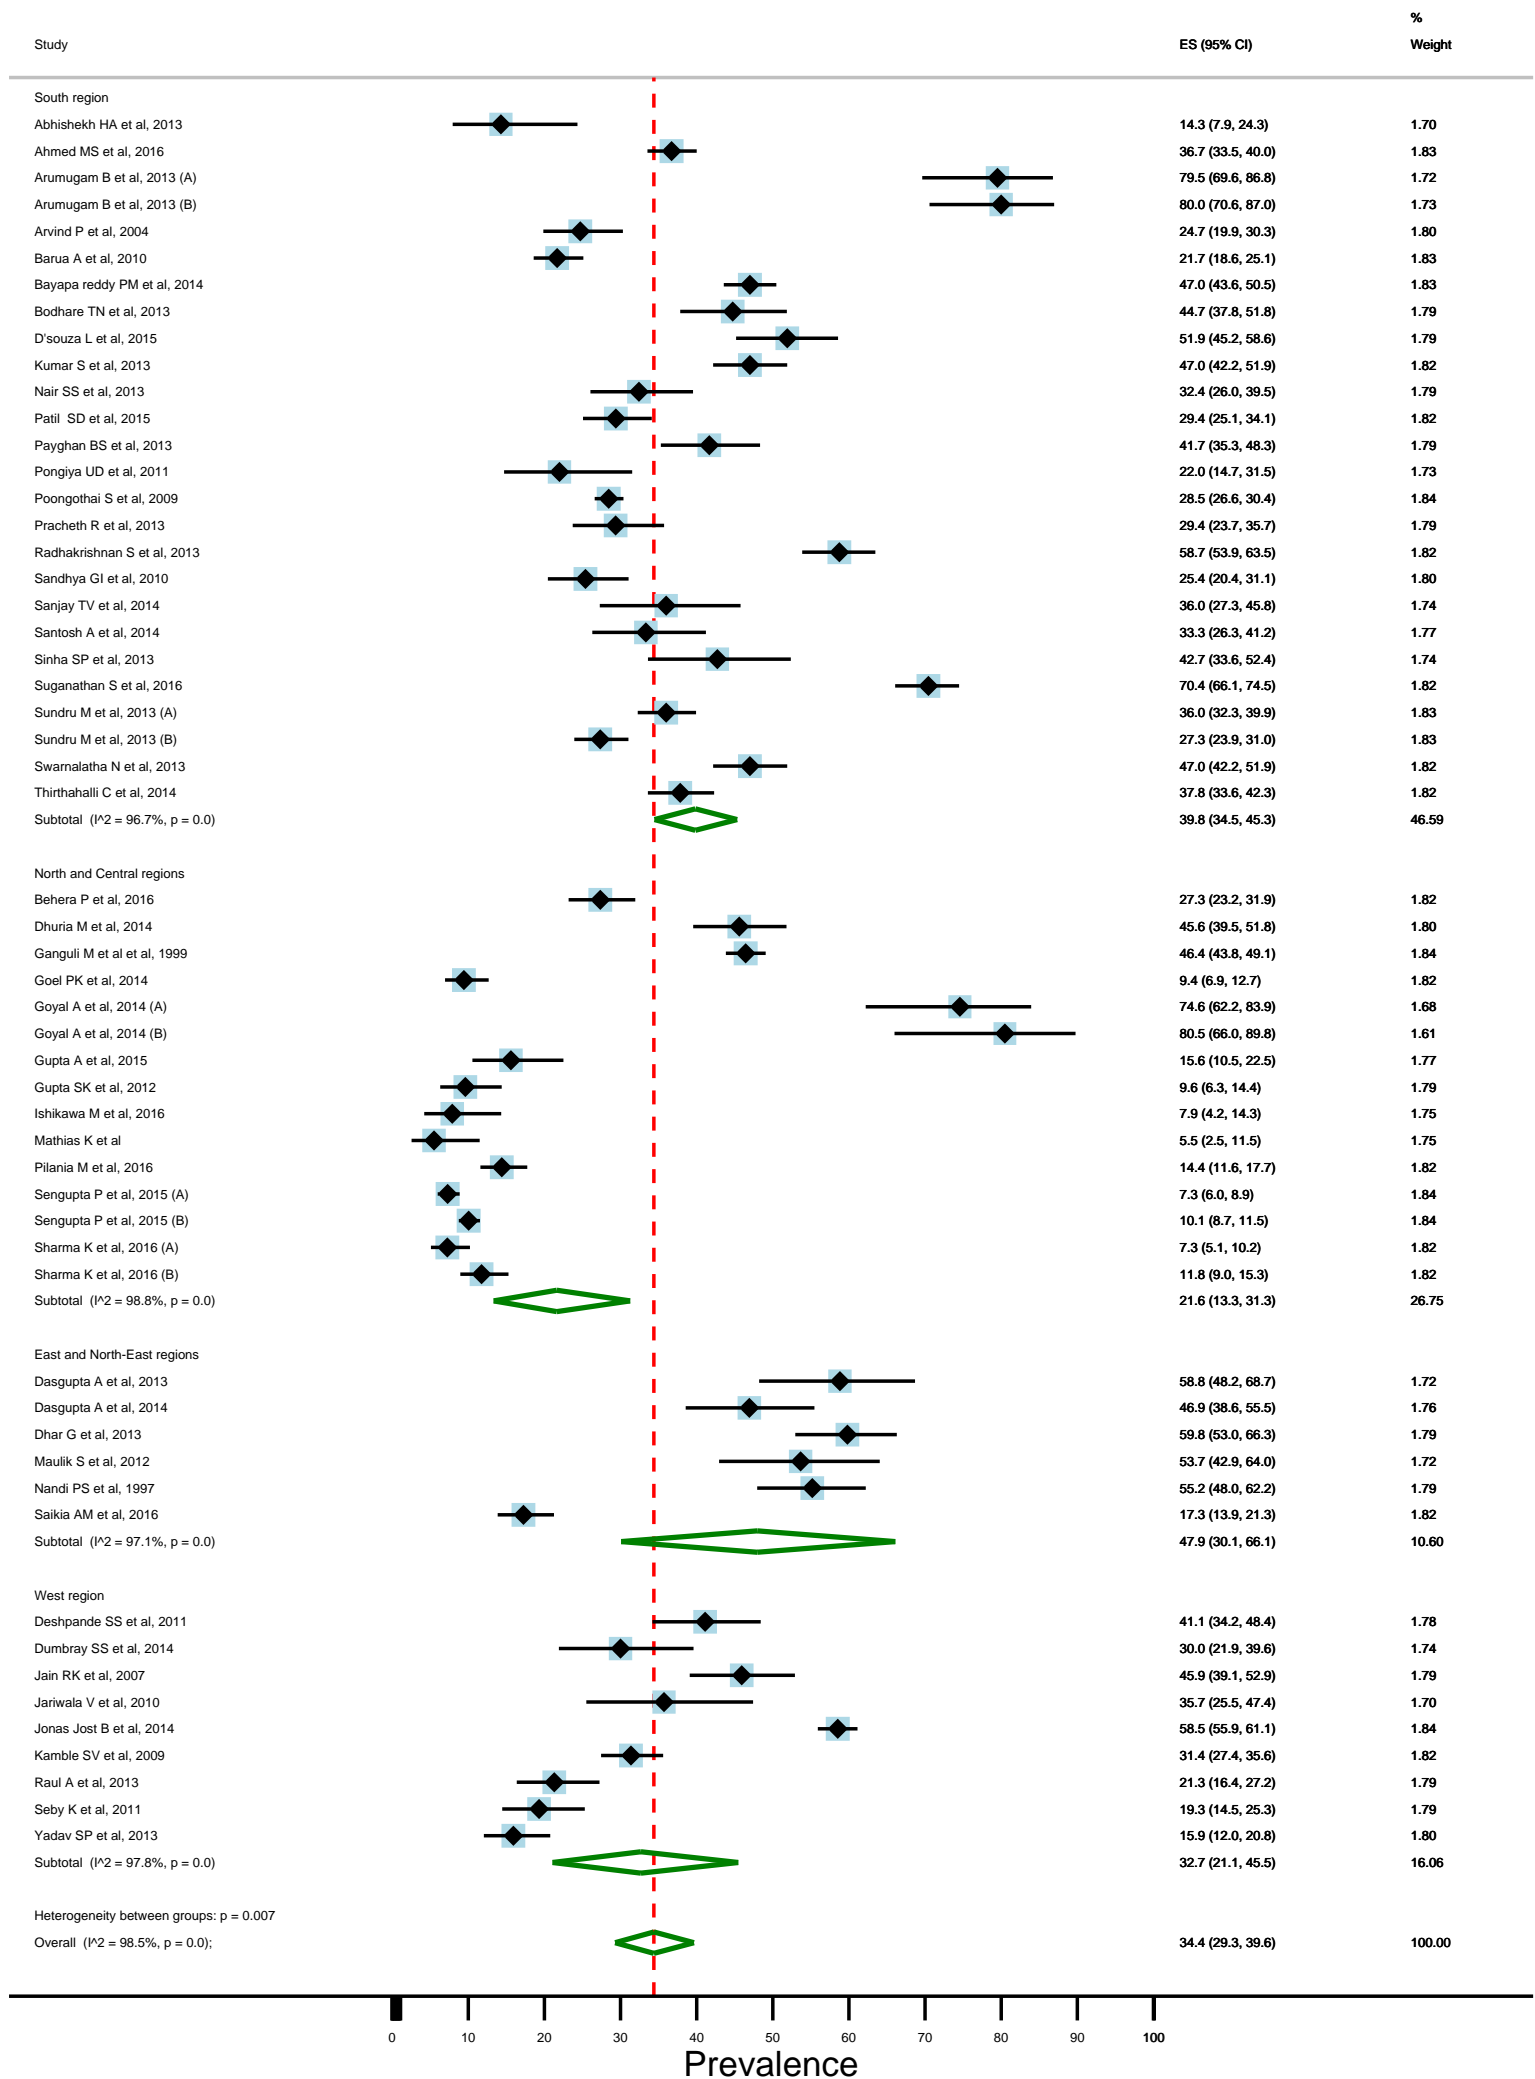

Supplementary figure 7: Estimated prevalence of depression among elderly persons in India-pooling included studies, 1997-2016 (Time period (decades) - subgroup analysis)

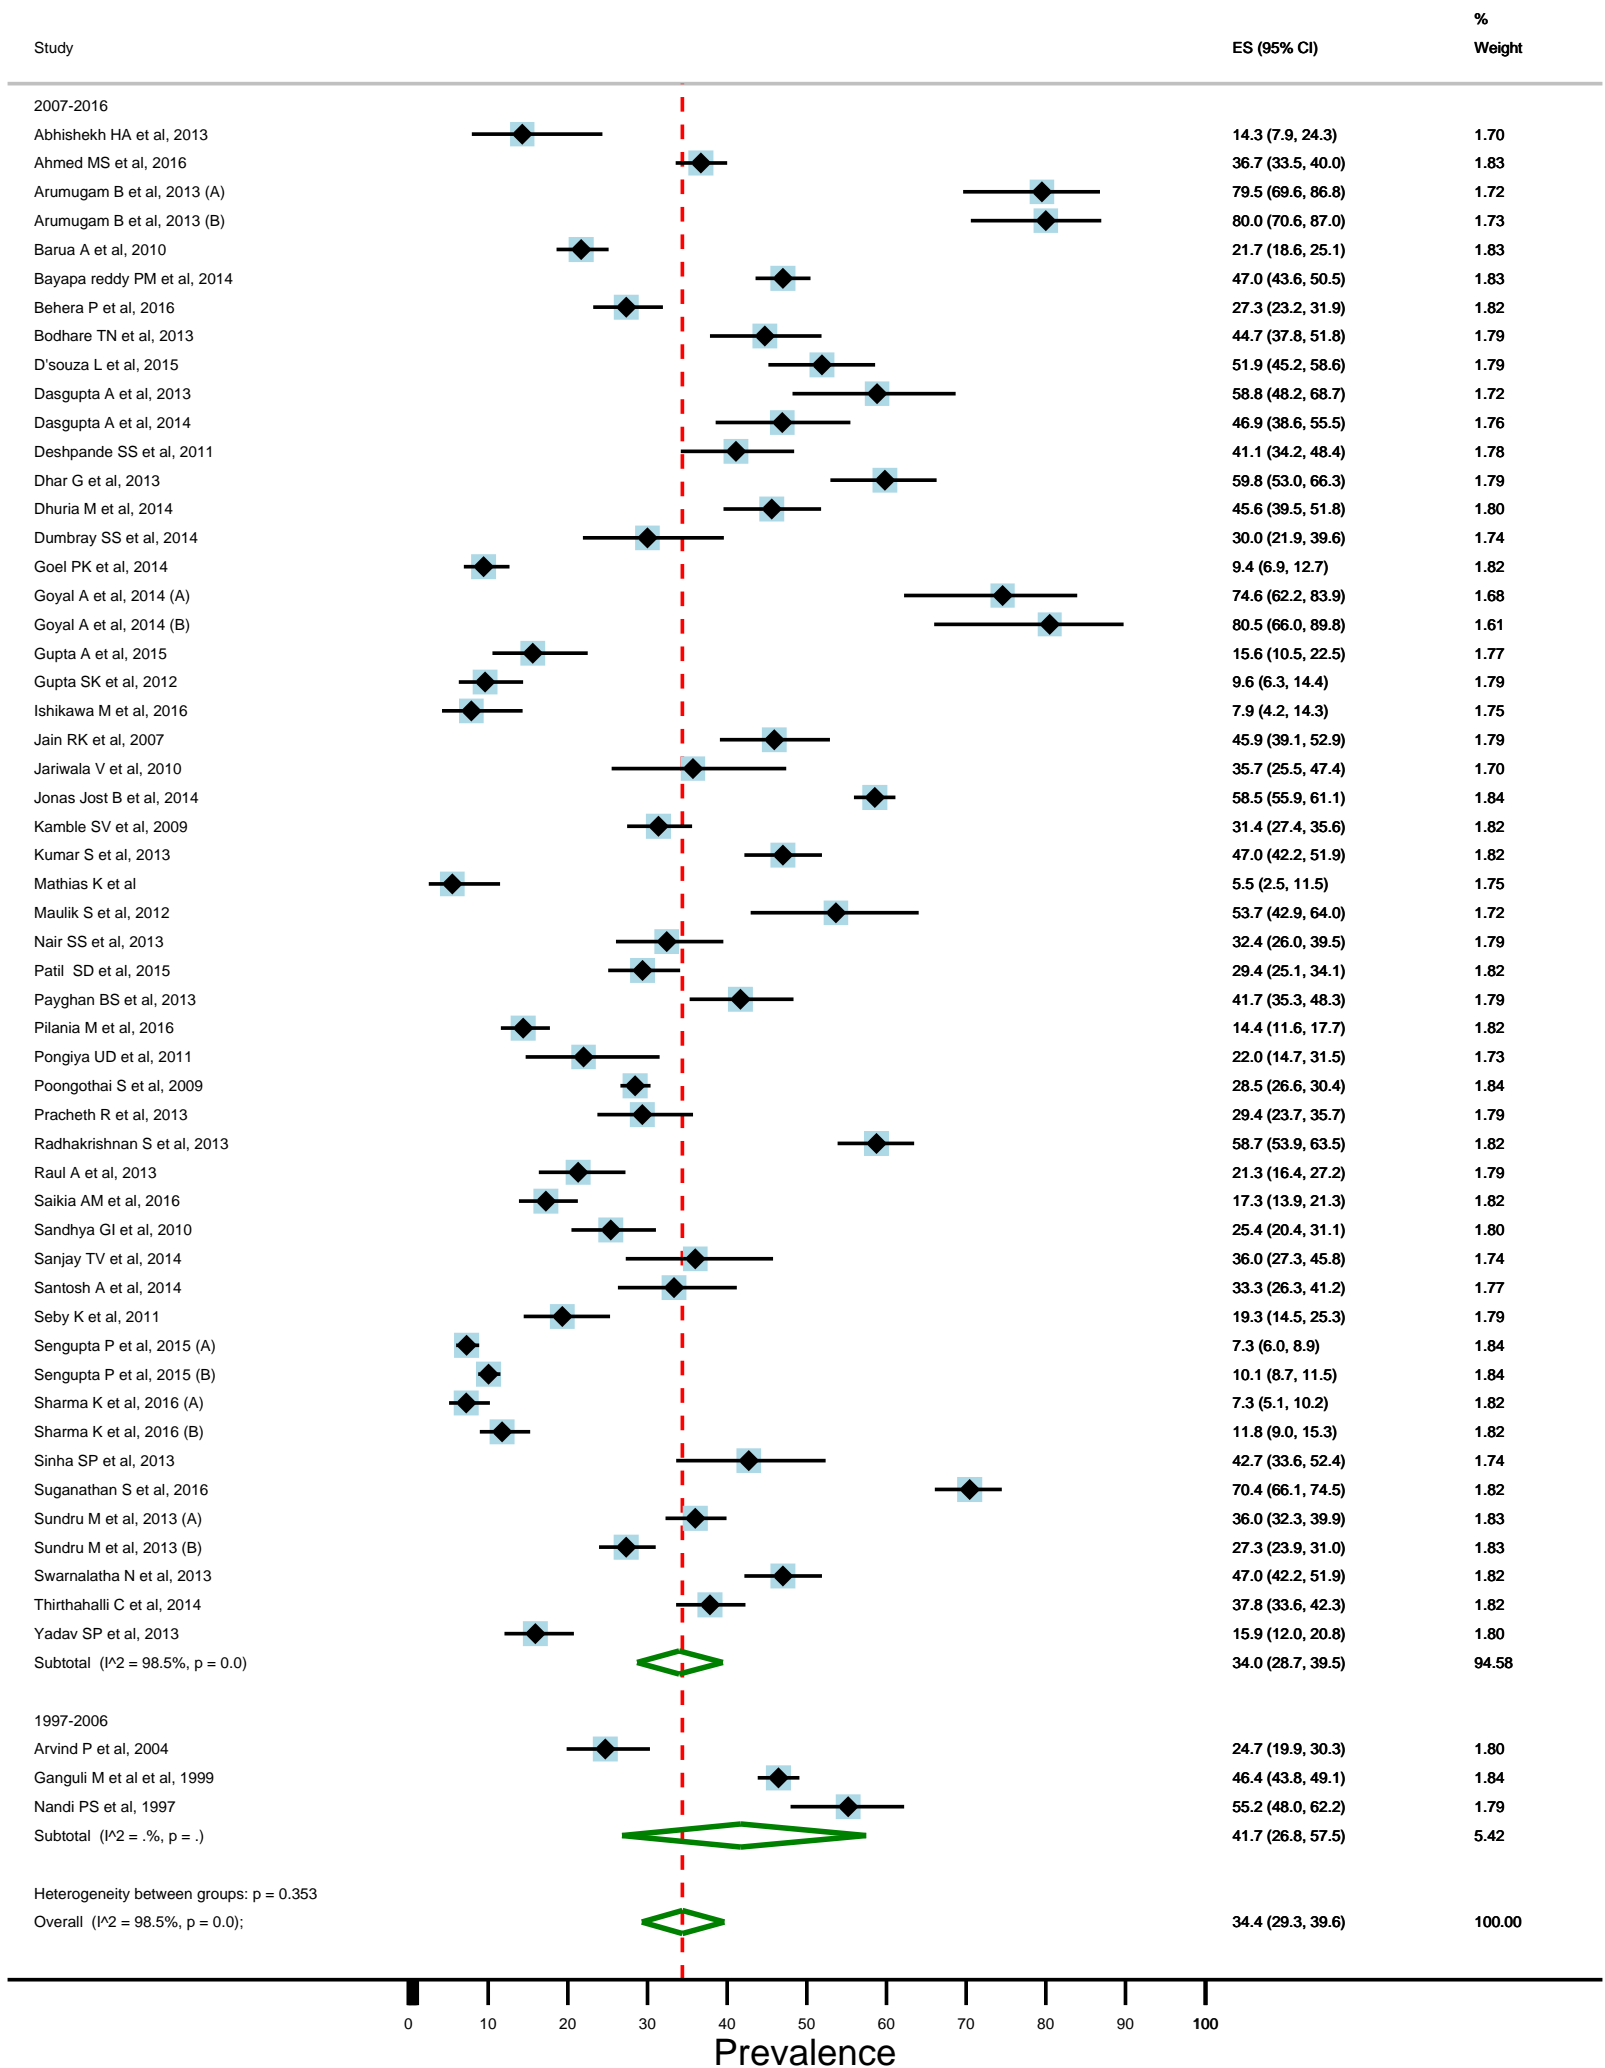

Supplementary figure 8: Estimated prevalence of depression among elderly persons in India- pooling included studies, 1997-2016 (Studies with inclusion age > 60 years only - sensitivity analysis)

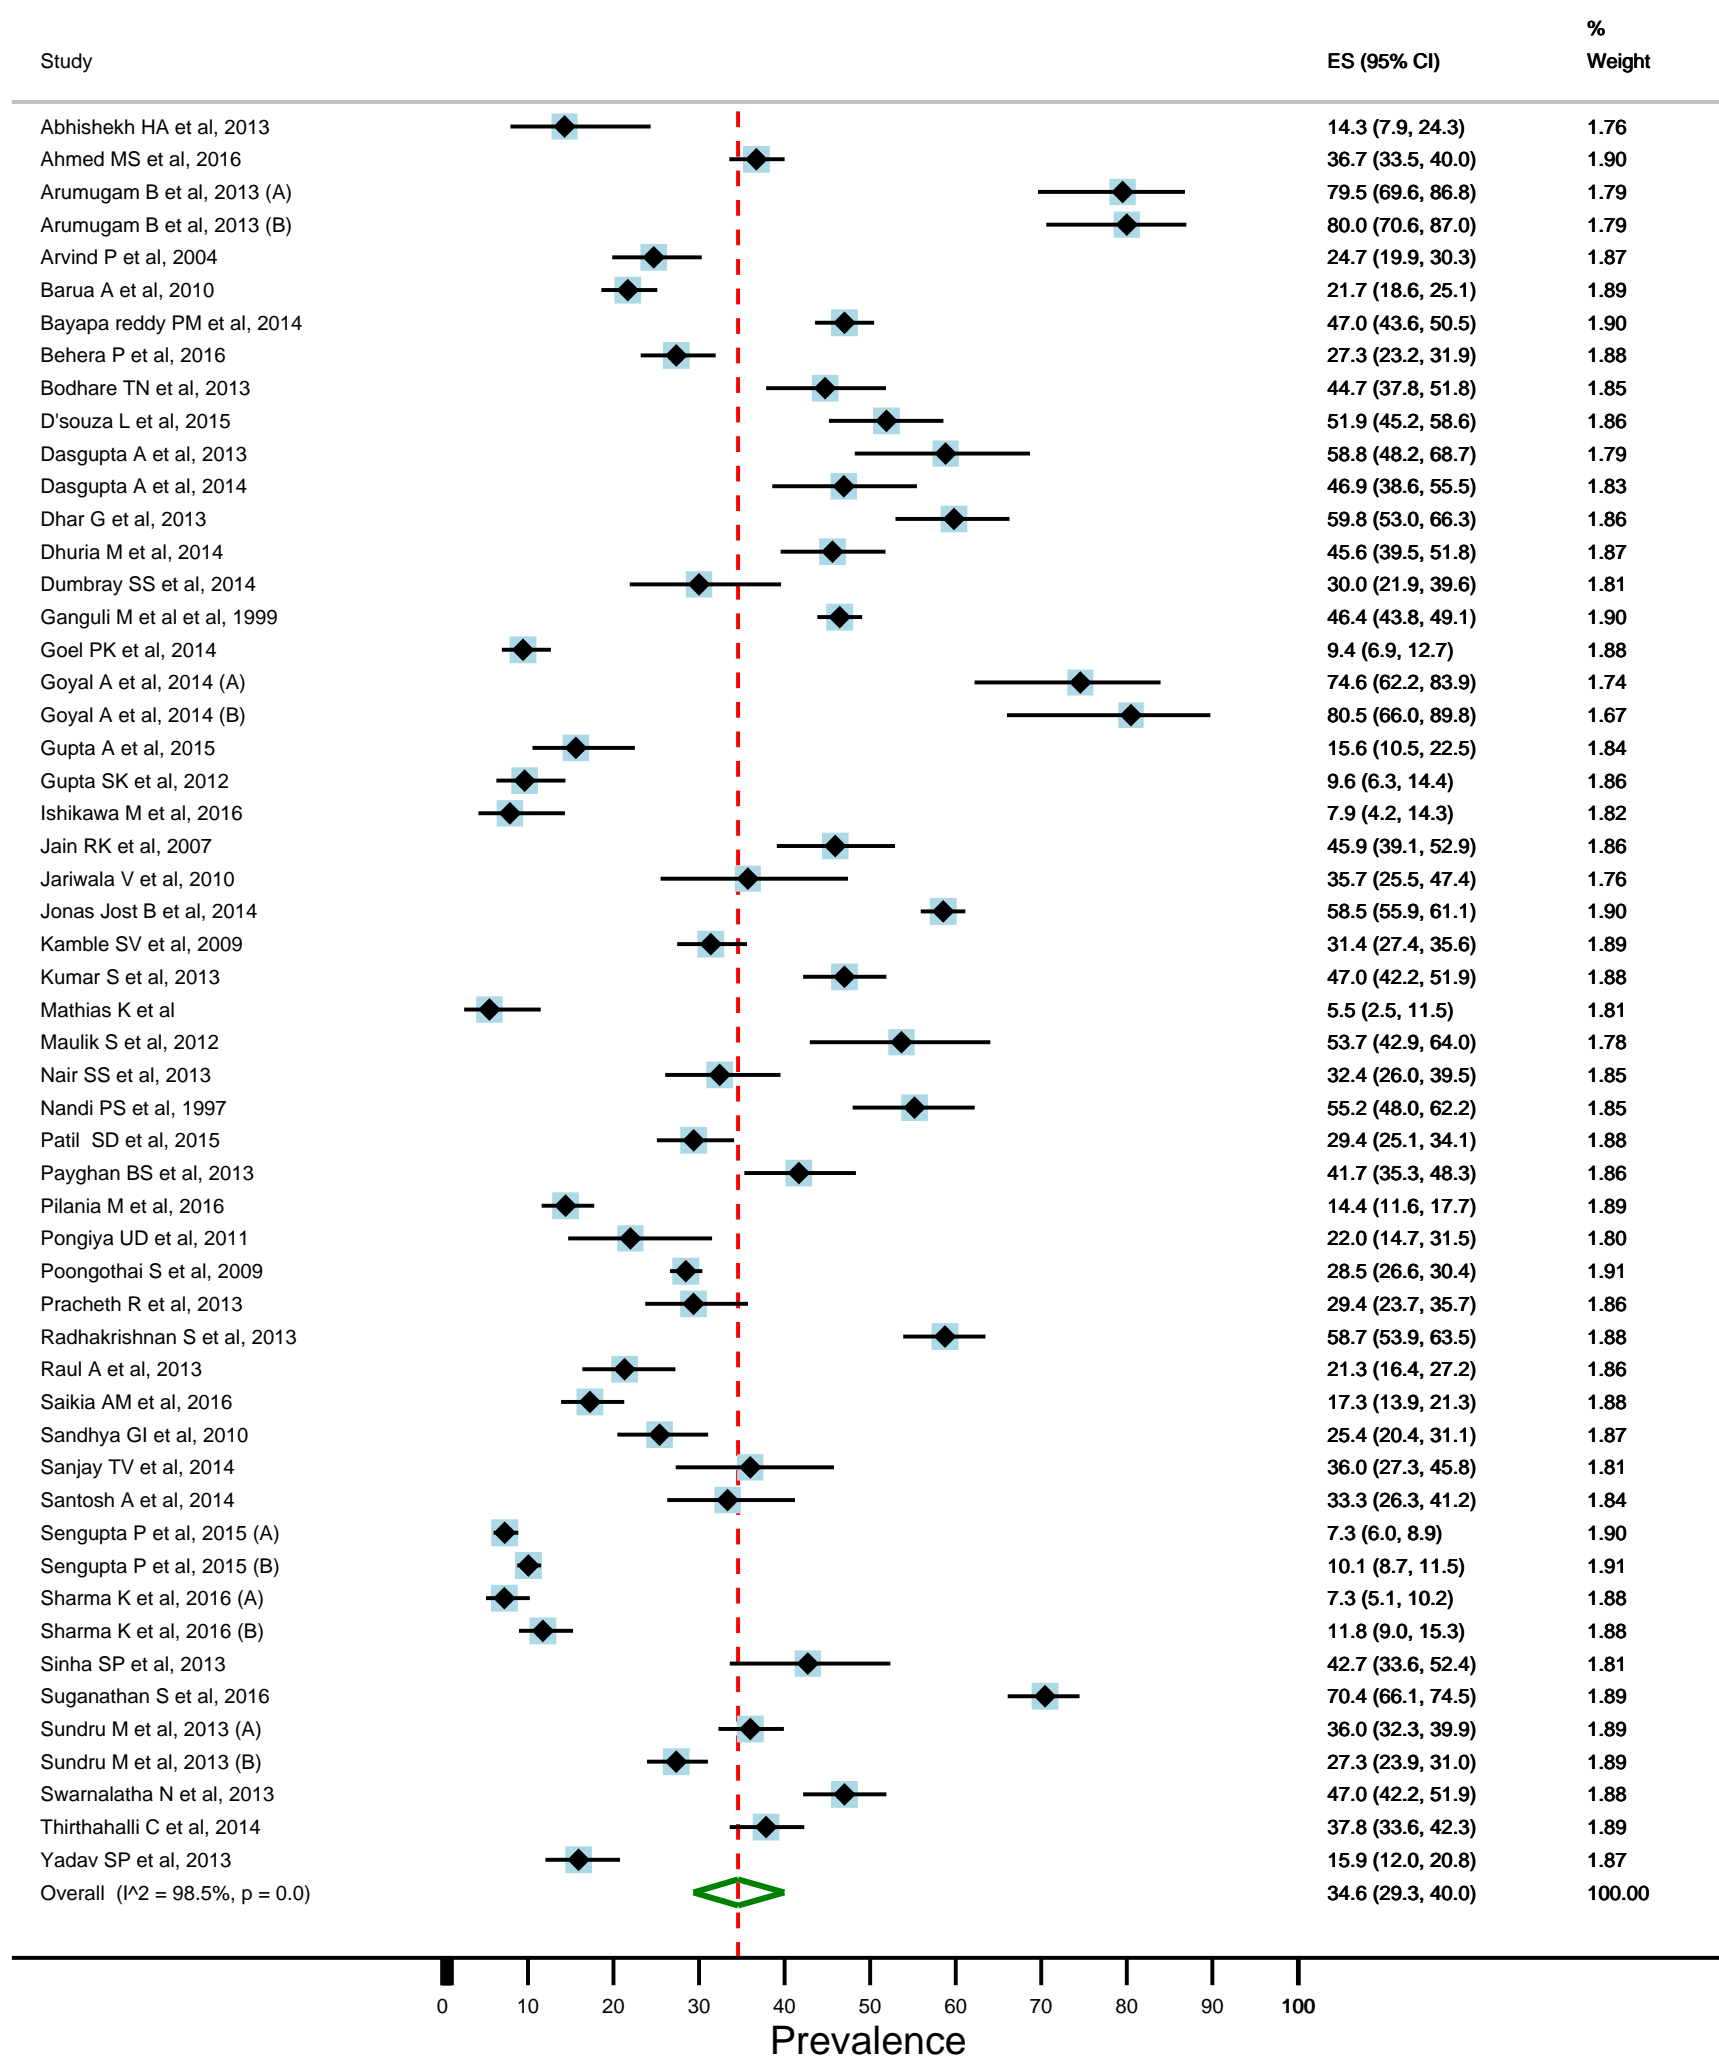



Supplementary figure 9: Estimated prevalence of depression among elderly persons in India- pooling included studies, 1997-2016 (Excluding studies with sample size <100 - sensitivity analysis)

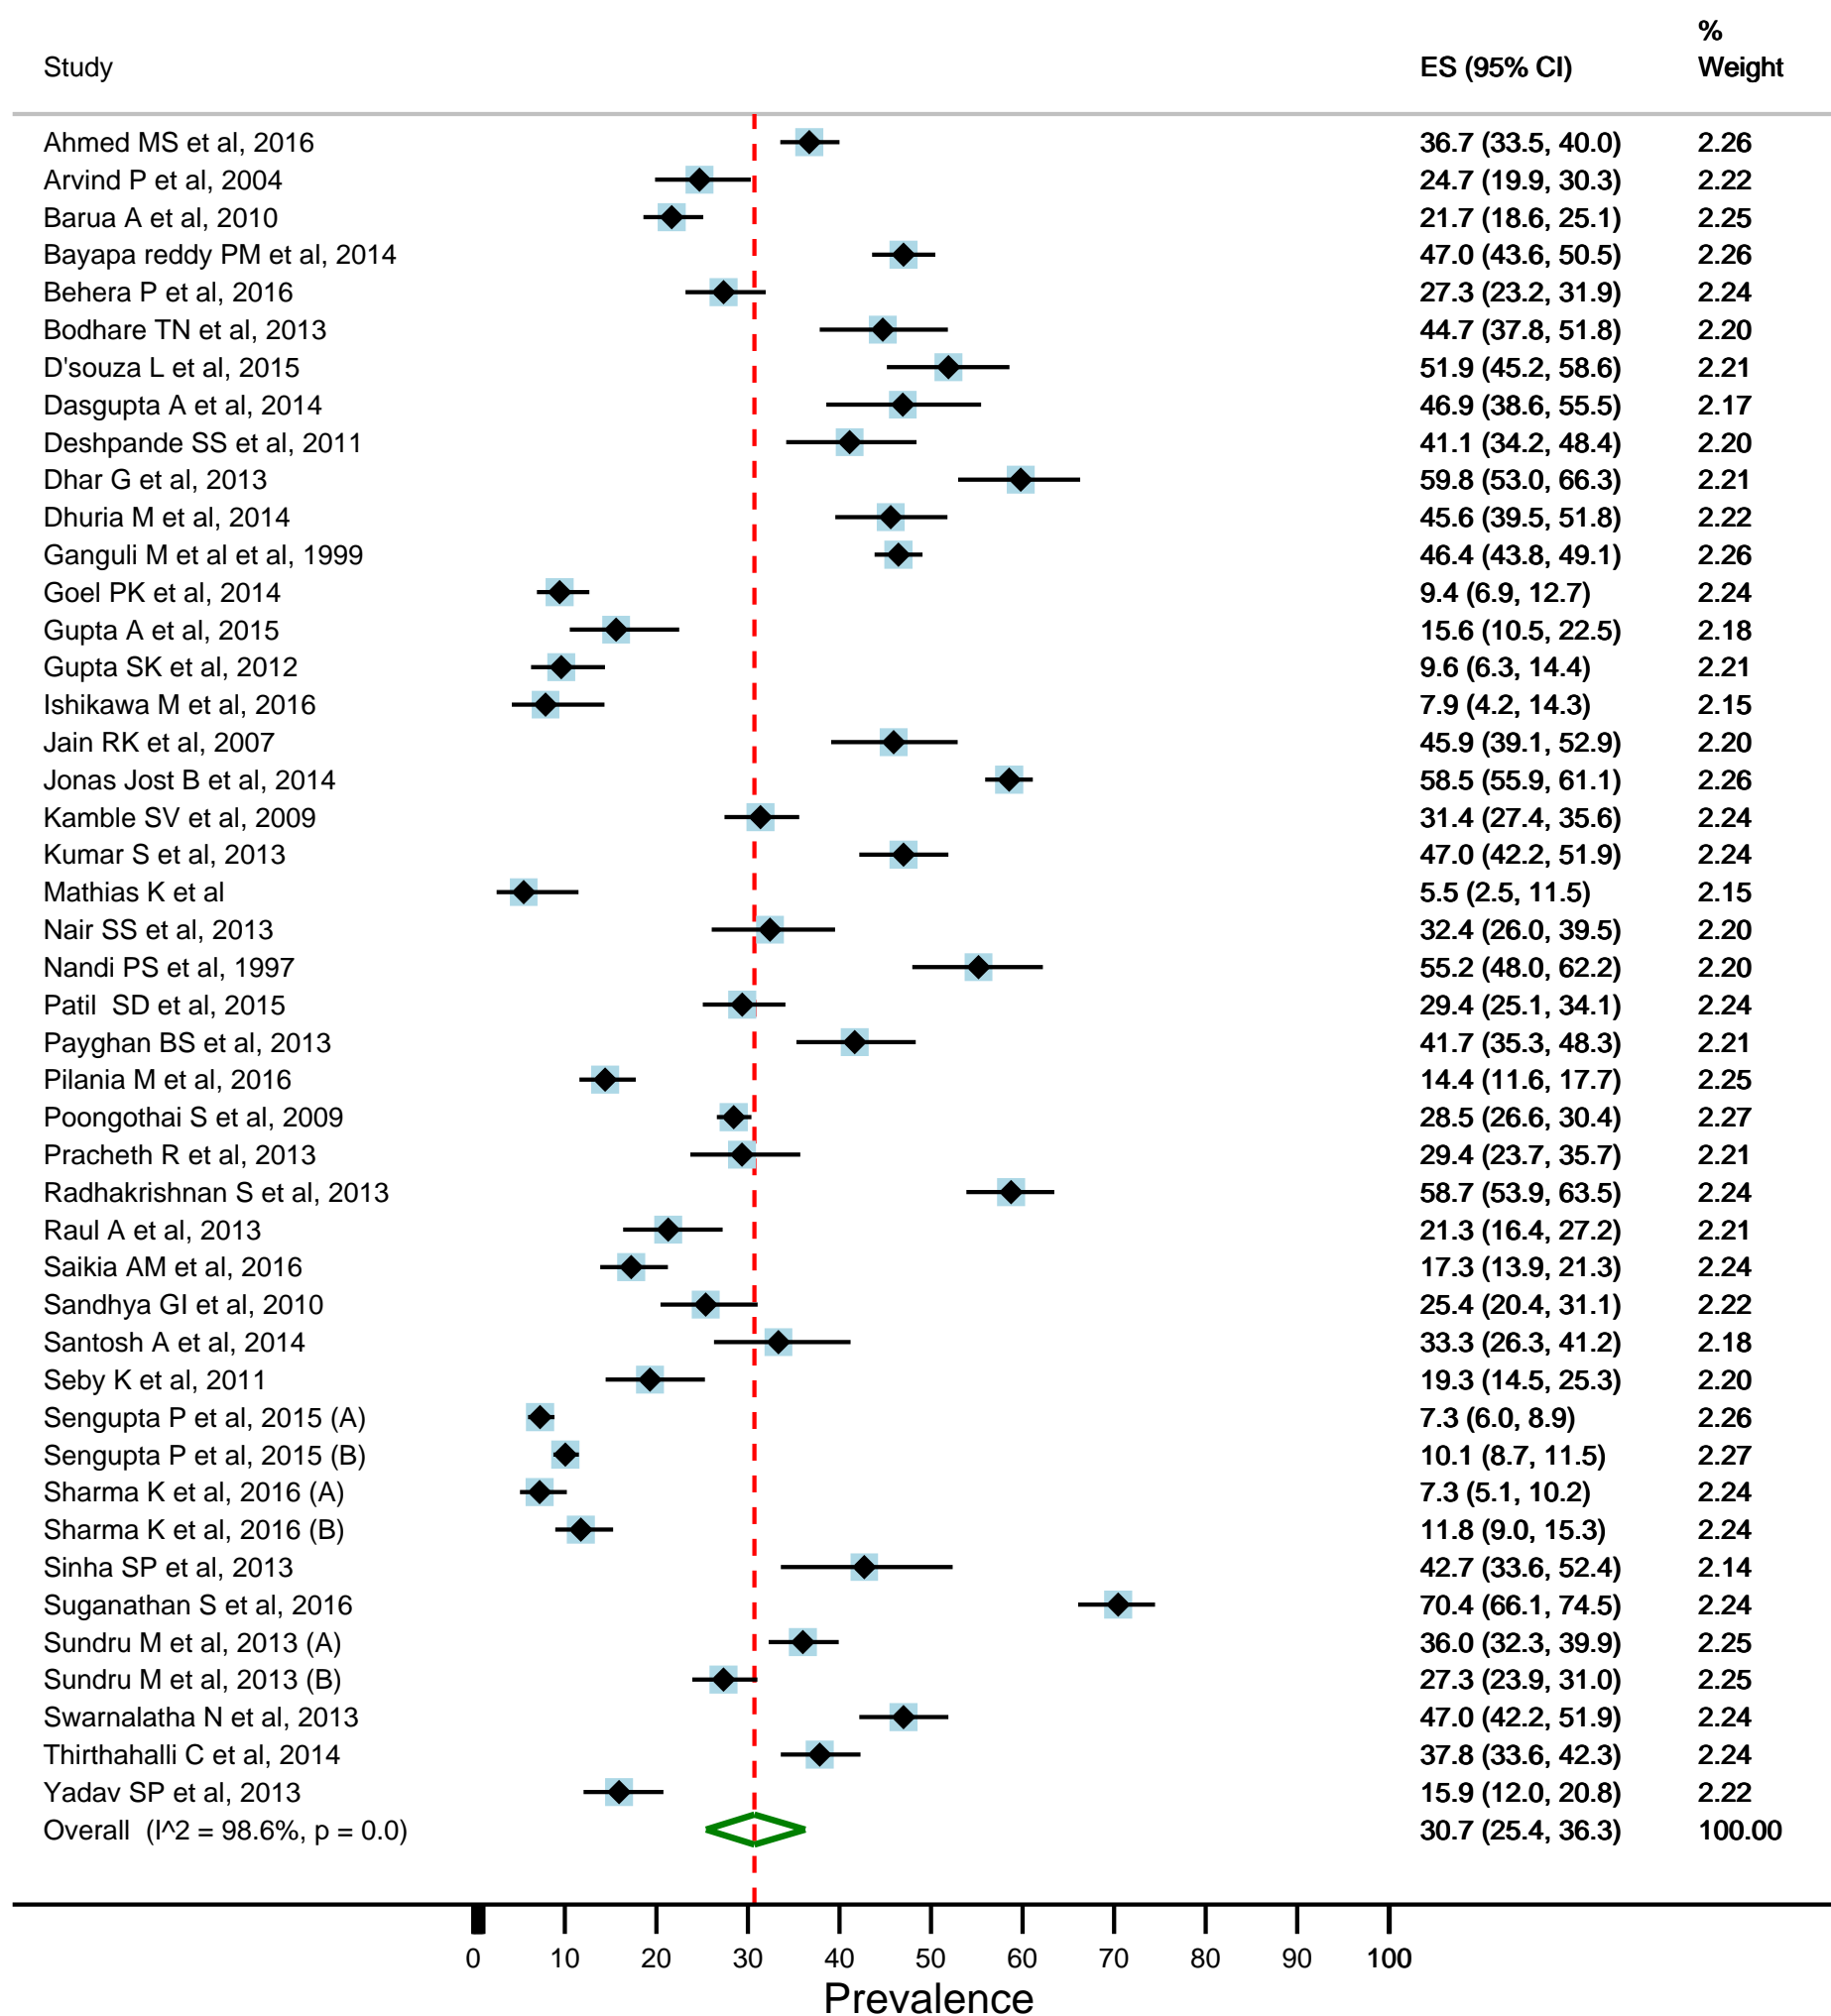

Supplementary figure 10: Estimated prevalence of depression among elderly persons in India- pooling included studies 1997-2016 (Studies with dementia exclusion - sensitivity analysis)

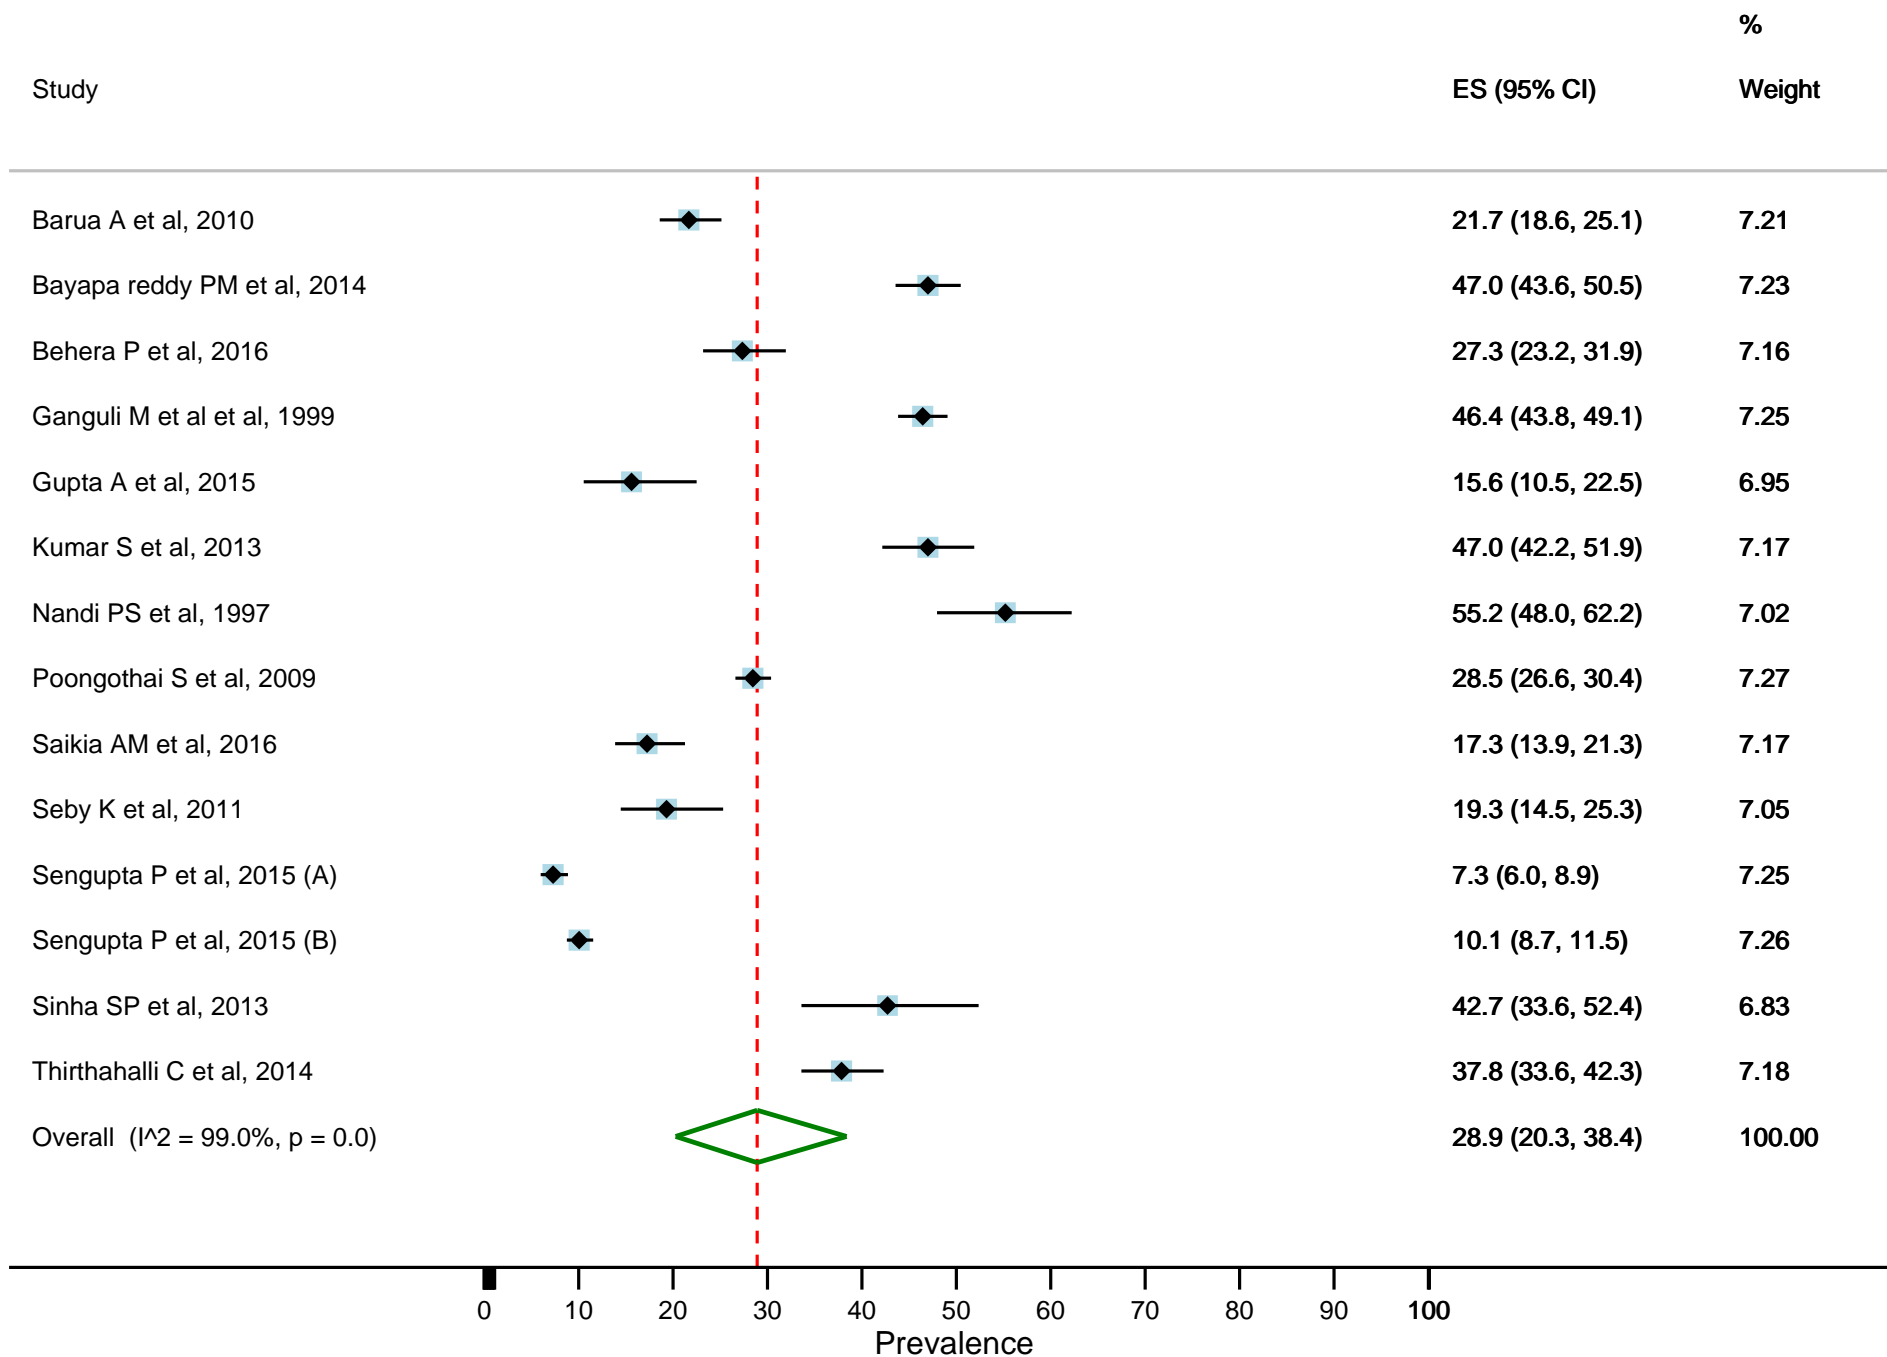

Supplement: MOESM3 [file 16862612]
